# Supplementary material for: Rapid and facile synthesis of siliceous MCM-48 mesoporous materials
Source: Royal Society of Chemistry journal article supplement (doi:10.1039/b706633c), 2007-01-01
Supplement: b706633c.pdf [file b706633c.pdf]

# Supplementary Material (ESI) for Chemical Communications

# This journal is (c) The Royal Society of Chemistry 2007

## **Rapid and Facile Synthesis of Siliceous MCM-48 Mesoporous Materials**

**Bret Boote,<sup>a</sup> Hariharaputhiran Subramanian<sup>b</sup> and Koodali T. Ranjit\*<sup>b</sup>**

<sup>a</sup> *Department of Chemistry, Northwestern College, Orange City, IA, USA.*

<sup>b</sup> *Department of Chemistry, University of South Dakota, Vermillion, USA.*

*E-mail: rkoodali@usd.edu*

Fig. S1 shows Transmission Electron Microscopy (TEM) image of MCM-48-300-20. MCM-48-300-20 refers to sample stirred at 300 rpm for 10 min and then aged statically for additional 20 min.

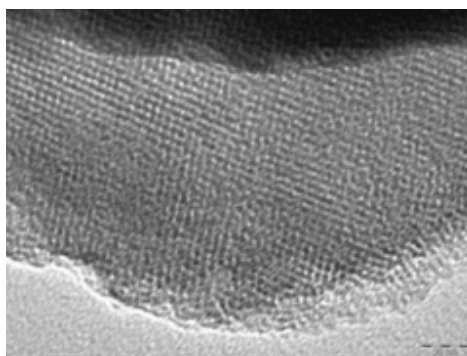

**Fig. S1**

# Supplementary Material (ESI) for Chemical Communications

# This journal is (c) The Royal Society of Chemistry 2007

Fig. S2 shows Scanning Electron Microscopy (SEM) image of a representative siliceous MCM-48 mesoporous material.

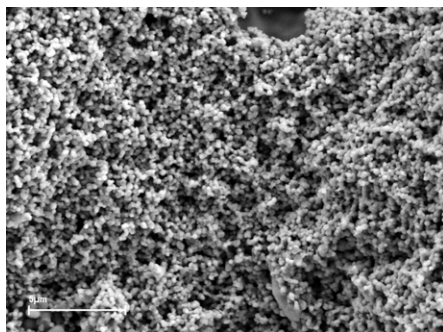

**Fig. S2**
